# Supplementary material for: Synthesis of bis(oxazoline)-based rare-earth metal complexes and their catalytic performance in the polymerization of isoprene and polar ortho-methoxystyrene
Source: Royal Society of Chemistry journal article supplement (doi:10.1039/d4dt01036a), 2024-01-01
Supplement: d4dt01036a1.pdf [file d4dt01036a1.pdf]

## SUPPORTING INFORMATION

### **Synthesis of Bis(oxazoline)-based Rare-earth Metal Complexes and Their Catalytic Performance in the Polymerization of Isoprene and Polar *ortho*-Methoxystyrene**

Shuhao You,<sup>a</sup> Wenyu Shi,<sup>a</sup> Ruoxue Ouyang,<sup>a</sup> Yang Wang<sup>a</sup> and Xiaochao Shi\*

<sup>a</sup>Department of Polymer Materials, School of Materials Science and Engineering, Shanghai University, Materials Building, Nanchen Street 333, Shanghai 200444, China. Email: xcshi@shu.edu.cn

**Figure S1**  $^1\text{H}$  NMR spectrum of **L1-H** (400 MHz,  $\text{CDCl}_3$ , 25 °C)  
**Figure S2**  $^{13}\text{C}$  NMR spectrum of **L1-H** (100 MHz,  $\text{CDCl}_3$ , 25 °C)  
**Figure S3**  $^1\text{H}$  NMR spectrum of **1-Y** (400 MHz,  $\text{C}_6\text{D}_6$ , 25 °C)  
**Figure S4**  $^{13}\text{C}$  NMR spectrum of **1-Y** (100 MHz,  $\text{C}_6\text{D}_6$ , 25 °C)  
**Figure S5**  $^1\text{H}$  NMR spectrum of **1-Lu** (400 MHz,  $\text{C}_6\text{D}_6$ , 25 °C)  
**Figure S6**  $^{13}\text{C}$  NMR spectrum of **1-Lu** (100 MHz,  $\text{C}_6\text{D}_6$ , 25 °C)  
**Figure S7**  $^1\text{H}$  NMR spectrum of **1-Sc** (400 MHz,  $\text{C}_6\text{D}_6$ , 25 °C)  
**Figure S8**  $^{13}\text{C}$  NMR spectrum of **1-Sc** (100 MHz,  $\text{C}_6\text{D}_6$ , 25 °C)  
**Figure S9**  $^1\text{H}$  NMR spectrum of **L2-H** (400 MHz,  $\text{CDCl}_3$ , 25 °C)  
**Figure S10**  $^{13}\text{C}$  NMR spectrum of **L2-H** (100 MHz,  $\text{CDCl}_3$ , 25 °C)  
**Figure S11**  $^1\text{H}$  NMR spectrum of **2-Y** (400 MHz,  $\text{C}_6\text{D}_6$ , 25 °C)  
**Figure S12**  $^{13}\text{C}$  NMR spectrum of **2-Y** (100 MHz,  $\text{C}_6\text{D}_6$ , 25 °C)  
**Figure S13**  $^1\text{H}$  NMR spectrum of **2-Lu** (400 MHz,  $\text{C}_6\text{D}_6$ , 25 °C)  
**Figure S14**  $^{13}\text{C}$  NMR spectrum of **2-Lu** (100 MHz,  $\text{C}_6\text{D}_6$ , 25 °C)  
**Figure S15**  $^1\text{H}$  NMR spectrum of **2-Sc** (400 MHz,  $\text{C}_6\text{D}_6$ , 25 °C)  
**Figure S16**  $^{13}\text{C}$  NMR spectrum of **2-Sc** (100 MHz,  $\text{C}_6\text{D}_6$ , 25 °C)  
**Figure S17**  $^1\text{H}$  NMR spectrum of **1-Y** and **1-Y** + 1 equiv. TIBA (400 MHz,  $\text{C}_6\text{D}_6$ , 25 °C)  
**Figure S18**  $^1\text{H}$  NMR spectrum of atactic P(*o*MOS) catalyzed by **1-Y**/[Ph<sub>3</sub>C][B(C<sub>6</sub>F<sub>5</sub>)<sub>4</sub>]/TIBA (400 MHz,  $\text{C}_2\text{Cl}_4\text{D}_2$ , 120 °C, Entry 3 in Table 2)  
**Figure S19**  $^{13}\text{C}$  NMR spectrum of atactic P(*o*MOS) catalyzed by **1-Y**/[Ph<sub>3</sub>C][B(C<sub>6</sub>F<sub>5</sub>)<sub>4</sub>]/TIBA (100 MHz,  $\text{C}_2\text{Cl}_4\text{D}_2$ , 120 °C, Entry 3 in Table 2)  
**Figure S20** GPC curves of different polymerization time catalyzed by **1-Y**. time: 3min (a), 2.5min (b), 2min (c), 1.5min (d), and 1min (e)  
**Figure S21** GPC curves of different monomer feeds catalyzed by **1-Y**. [IP]/[**1-Y**]: 1500 (a), 1000 (b), 750 (c), 500 (d), and 300 (e)  
**Table S1** Summary of the crystallographic data for **1-Y**, **1-Lu** and **2-Sc**

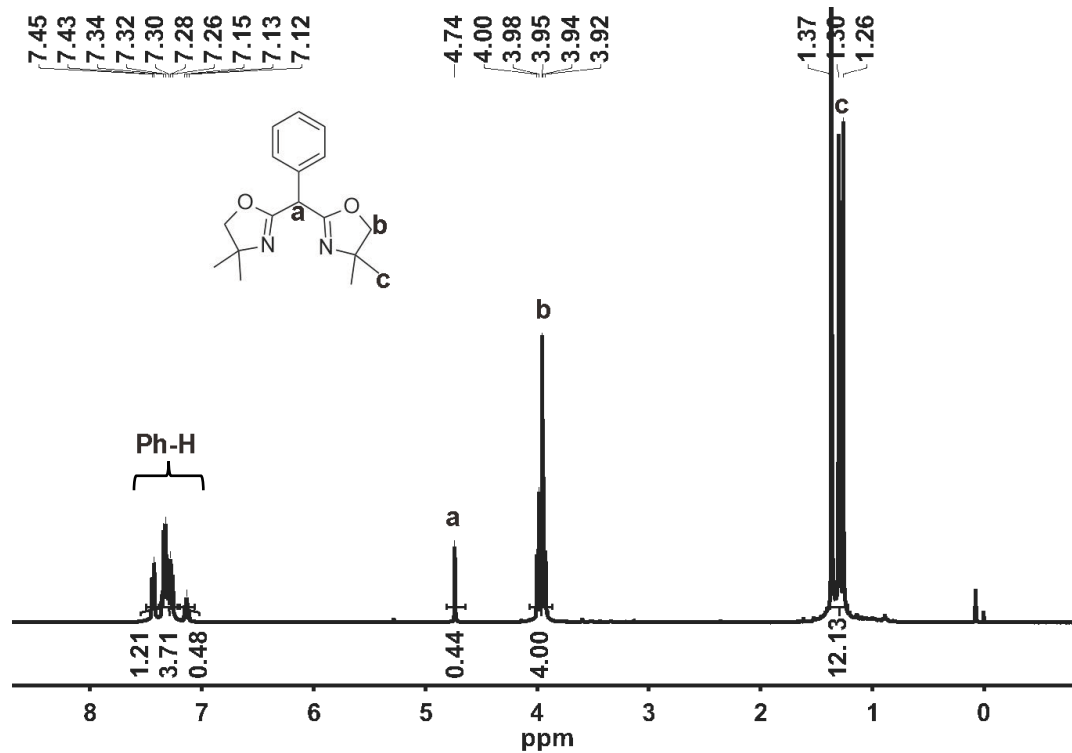

Figure S1  $^1\text{H}$  NMR spectrum of L1-H (400 MHz,  $\text{CDCl}_3$ , 25  $^\circ\text{C}$ )

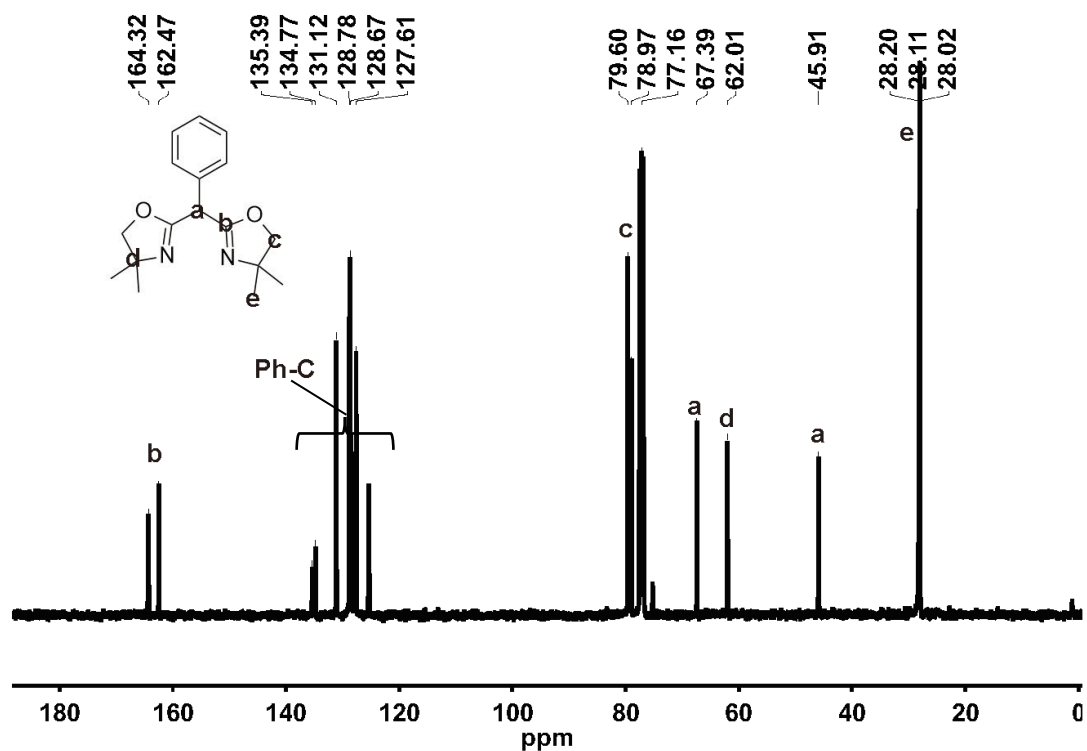

Figure S2  $^{13}\text{C}$  NMR spectrum of L1-H (100 MHz,  $\text{CDCl}_3$ , 25  $^\circ\text{C}$ )

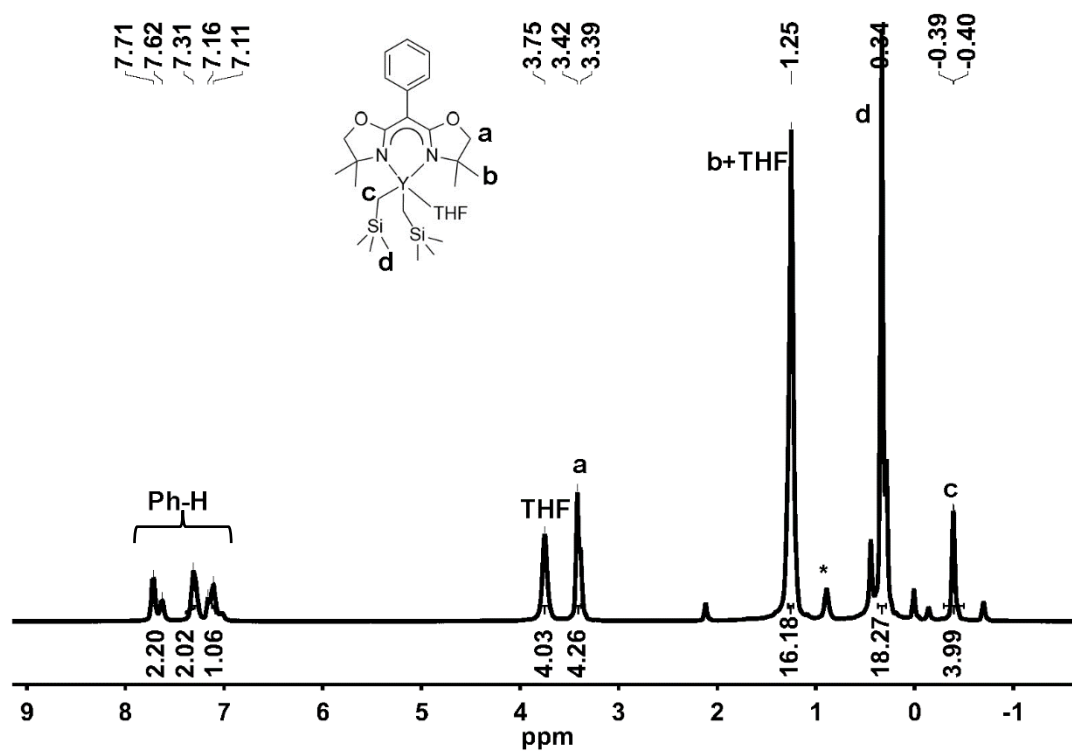

Figure S3  $^1\text{H}$  NMR spectrum of 1-Y (400 MHz,  $\text{C}_6\text{D}_6$ , 25  $^\circ\text{C}$ ; \* *n*-hexane)

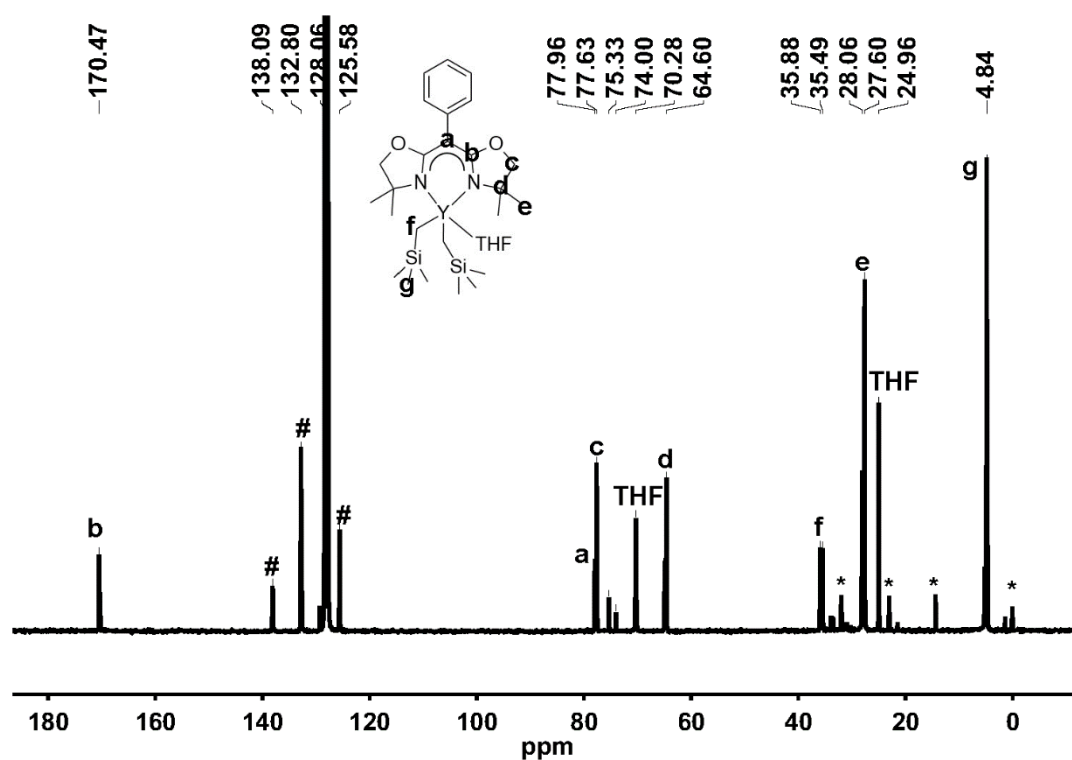

Figure S4  $^{13}\text{C}$  NMR spectrum of 1-Y (100 MHz,  $\text{C}_6\text{D}_6$ , 25  $^\circ\text{C}$ ; \* *n*-hexane; # Ph-C)

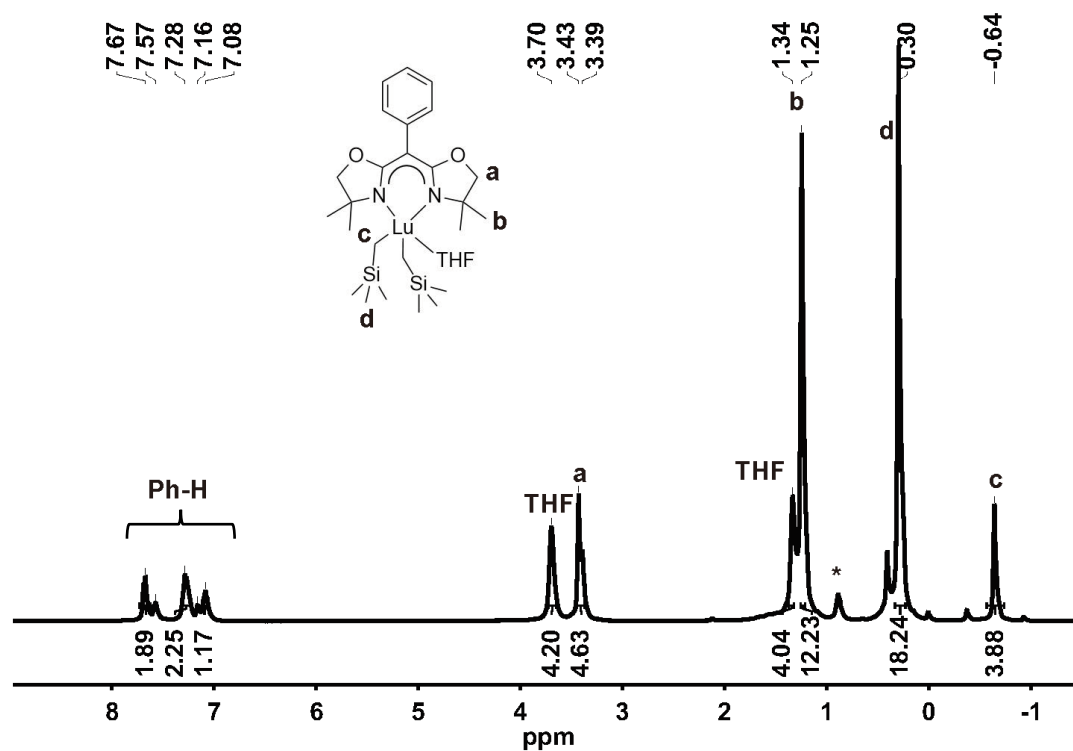

Figure S5  $^1\text{H}$  NMR spectrum of **1-Lu** (400 MHz,  $\text{C}_6\text{D}_6$ , 25 °C; \* *n*-hexane)

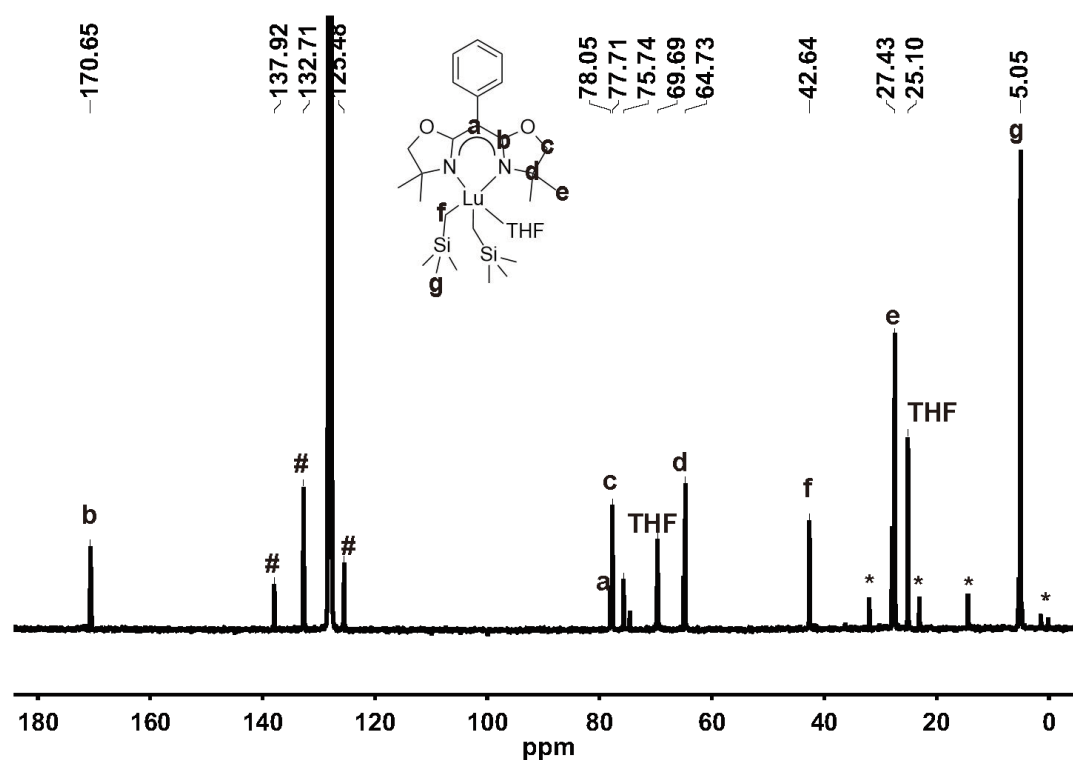

Figure S6  $^{13}\text{C}$  NMR spectrum of **1-Lu** (100 MHz,  $\text{C}_6\text{D}_6$ , 25 °C; \* *n*-hexane; # Ph-C)

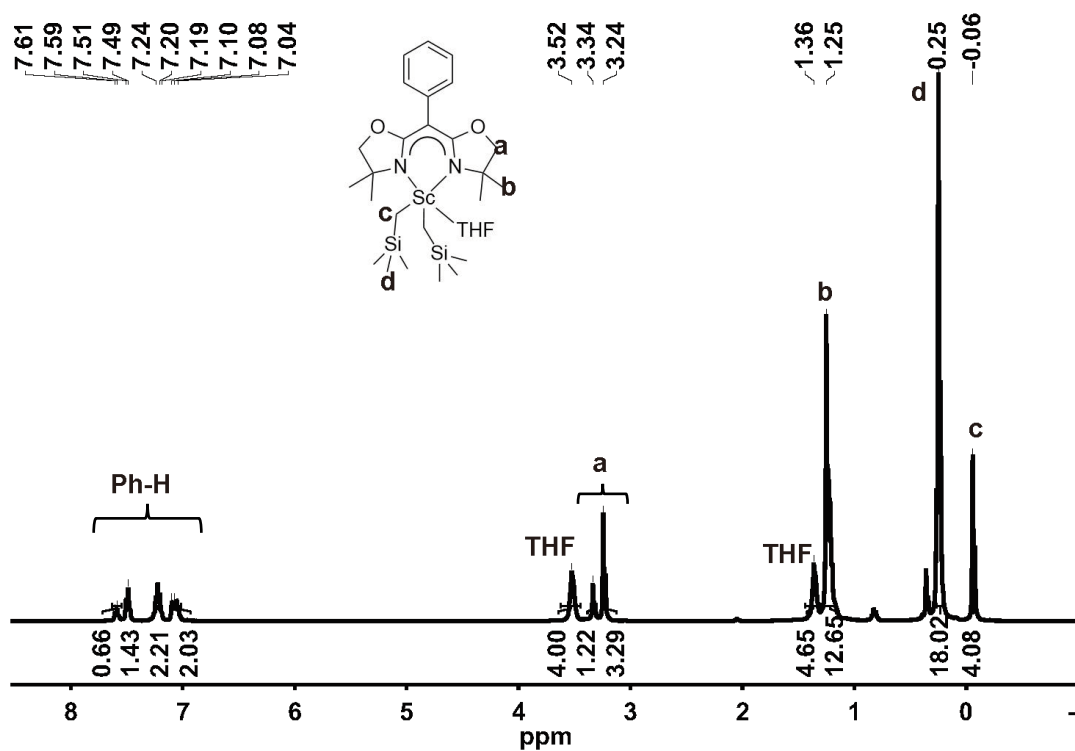

Figure S7  $^1\text{H}$  NMR spectrum of 1-Sc (400 MHz,  $\text{C}_6\text{D}_6$ , 25 °C)

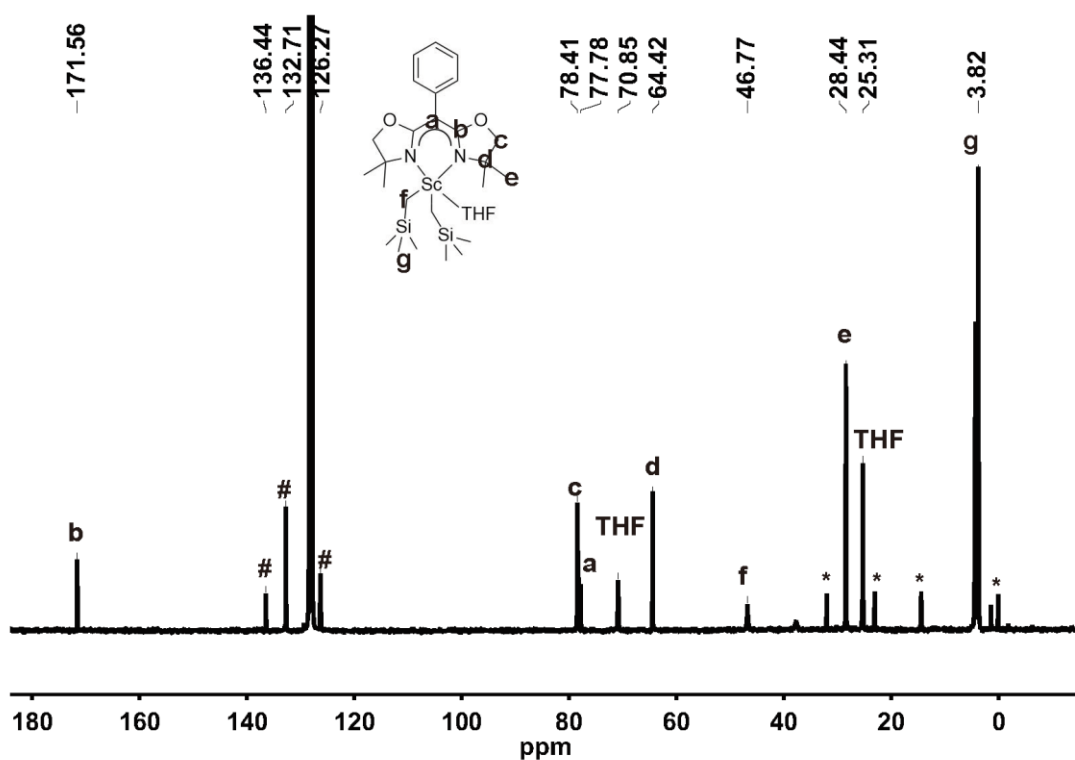

Figure S8  $^{13}\text{C}$  NMR spectrum of 1-Sc (100 MHz,  $\text{C}_6\text{D}_6$ , 25 °C; \**n*-hexane; # Ph-C)

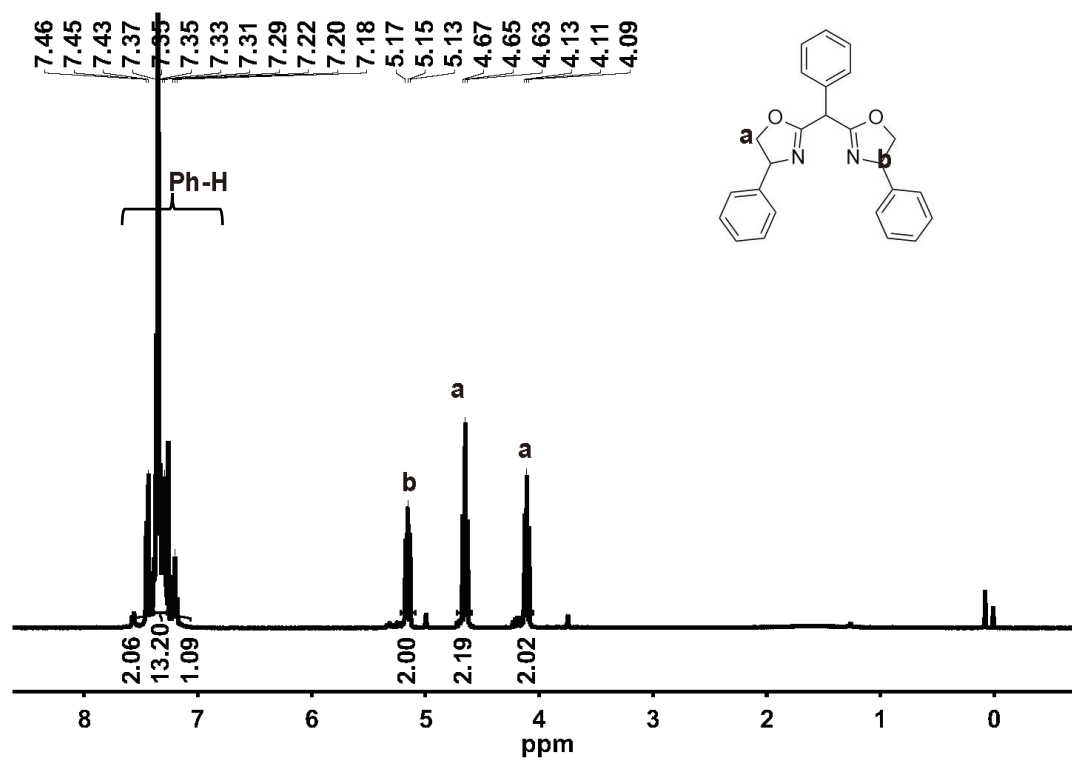

Figure S9  $^1\text{H}$  NMR spectrum of L2-H (400 MHz,  $\text{CDCl}_3$ , 25 °C)

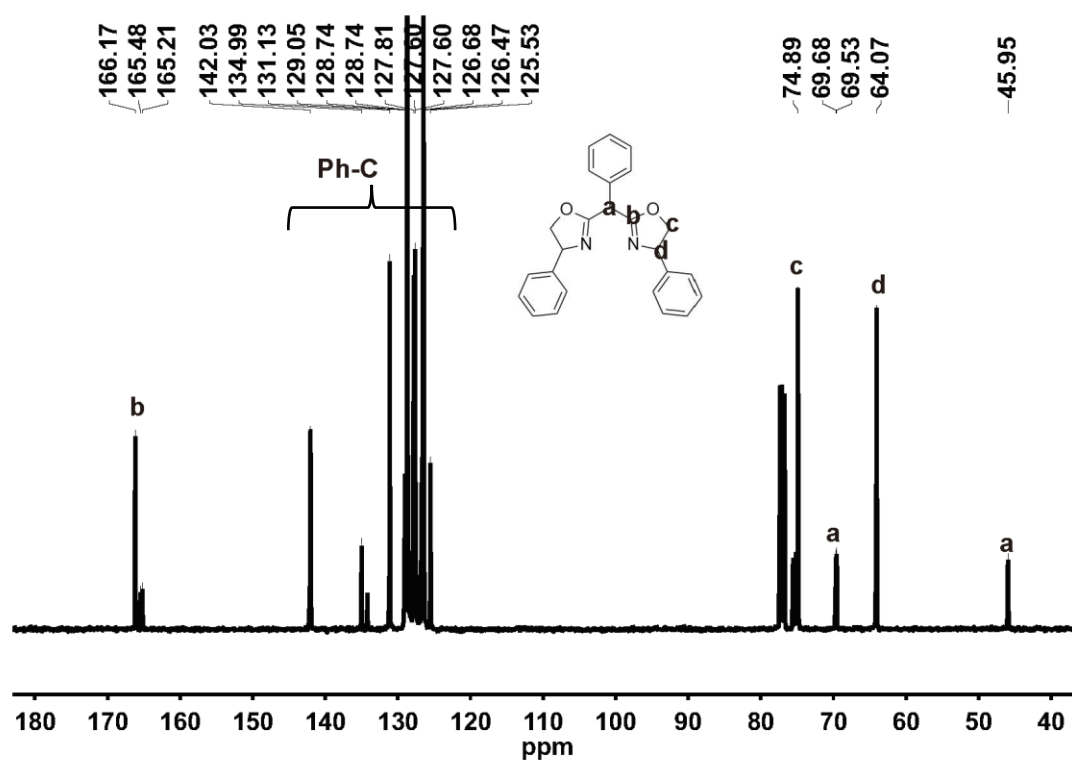

Figure S10  $^{13}\text{C}$  NMR spectrum of L2-H (100 MHz,  $\text{CDCl}_3$ , 25 °C)

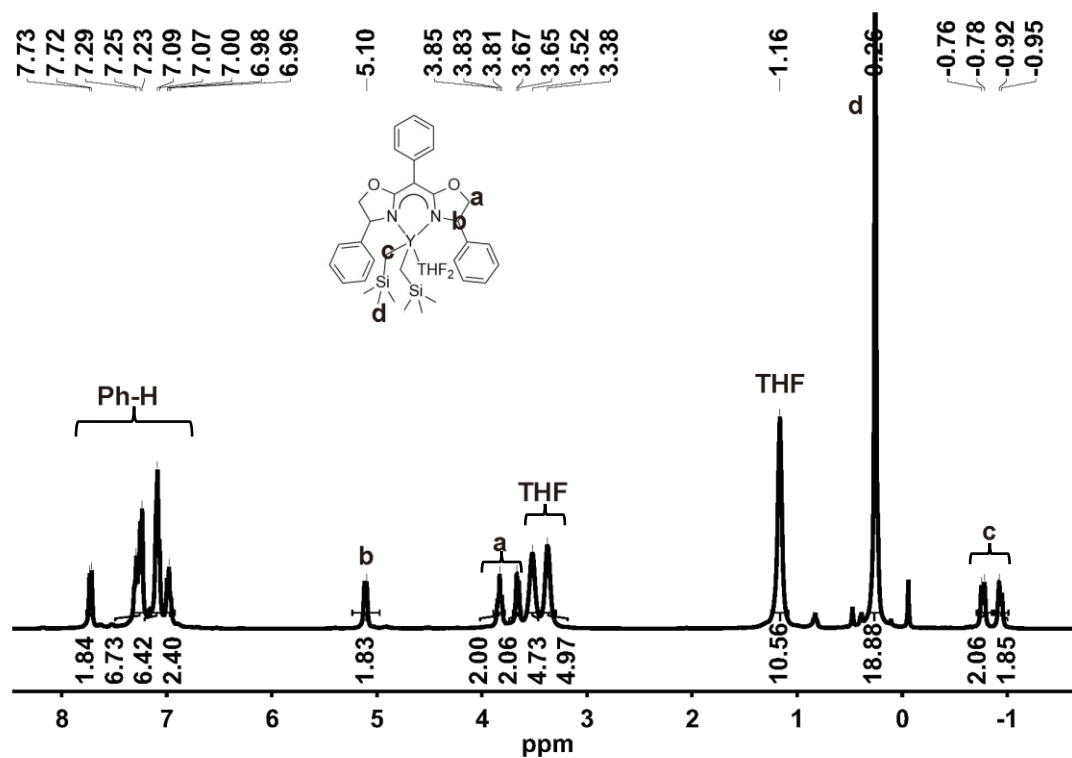

Figure S11  $^1\text{H}$  NMR spectrum of 2-Y (400 MHz,  $\text{C}_6\text{D}_6$ , 25 °C)

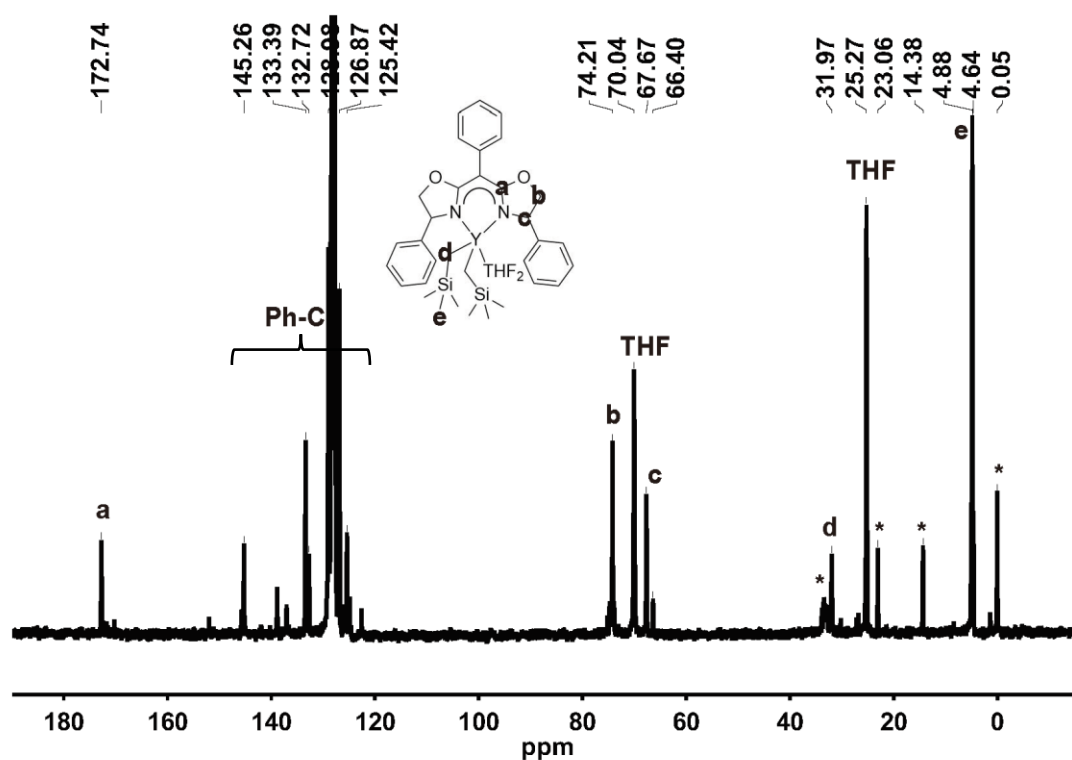

Figure S12  $^{13}\text{C}$  NMR spectrum of 2-Y (100 MHz,  $\text{C}_6\text{D}_6$ , 25 °C; \* *n*-hexane)



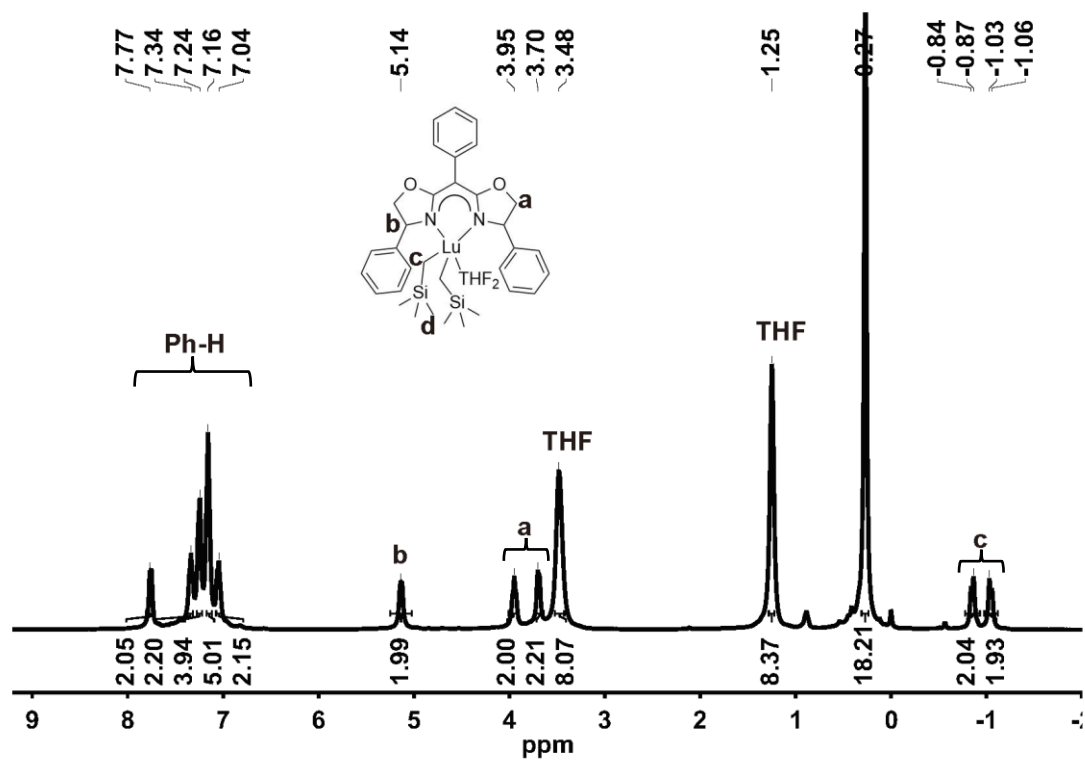

Figure S13  $^1\text{H}$  NMR spectrum of **2-Lu** (400 MHz,  $\text{C}_6\text{D}_6$ , 25 °C)

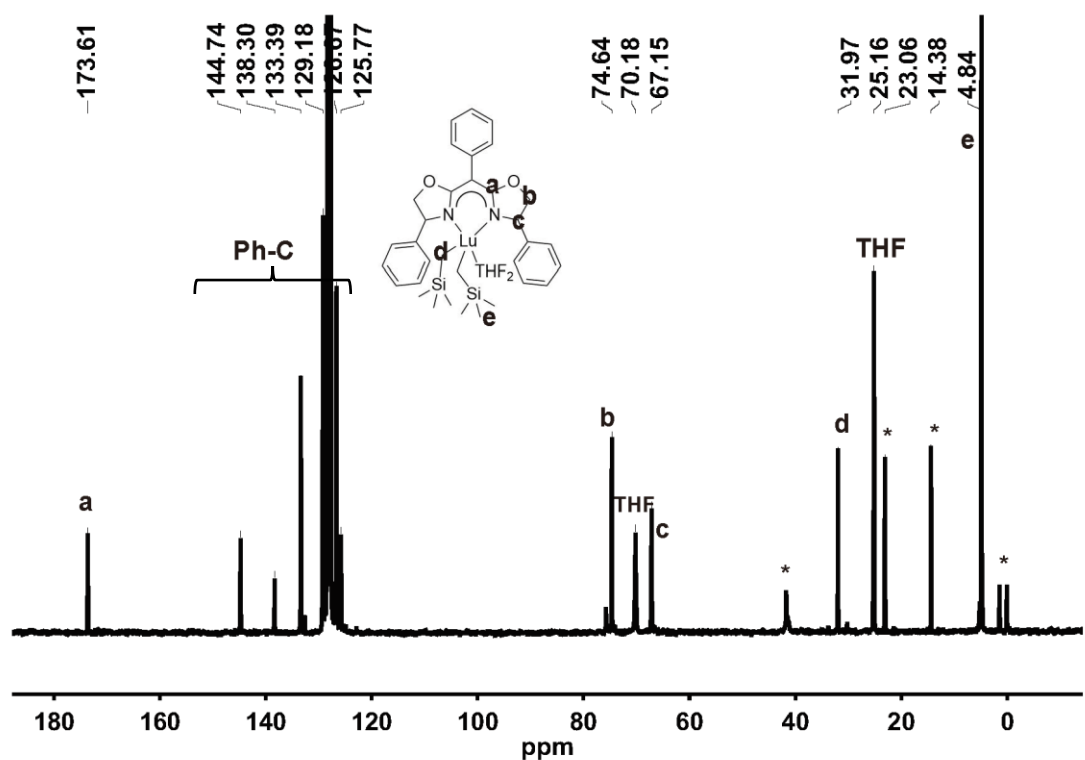

Figure S14  $^{13}\text{C}$  NMR spectrum of **2-Lu** (100 MHz,  $\text{C}_6\text{D}_6$ , 25 °C; \* *n*-hexane)

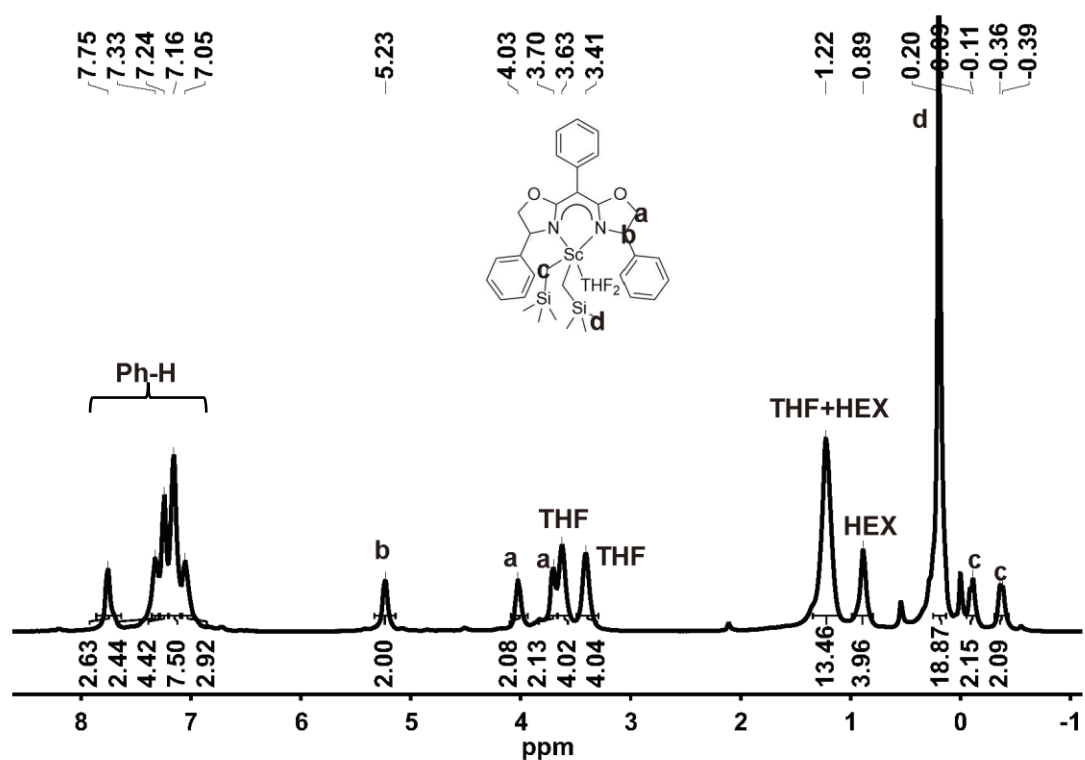

Figure S15  $^1\text{H}$  NMR spectrum of 2-Sc (400 MHz,  $\text{C}_6\text{D}_6$ , 25  $^\circ\text{C}$ )

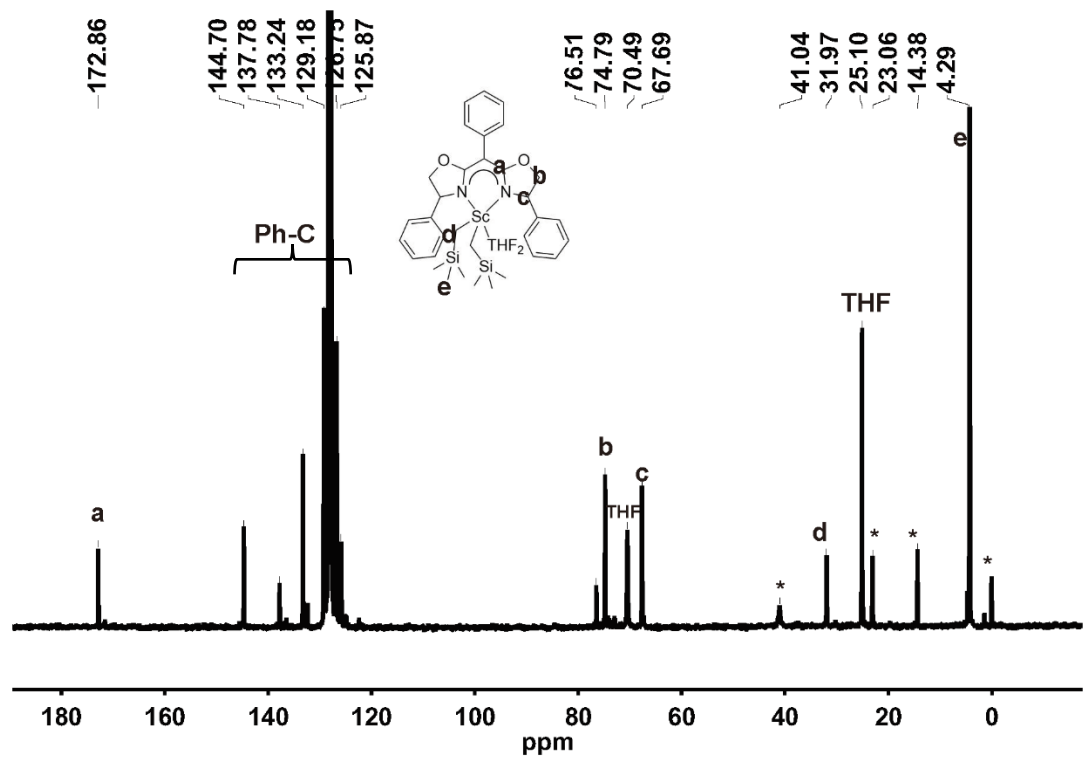

Figure S16  $^{13}\text{C}$  NMR spectrum of 2-Sc (100 MHz,  $\text{C}_6\text{D}_6$ , 25  $^\circ\text{C}$ ; \* *n*-hexane)

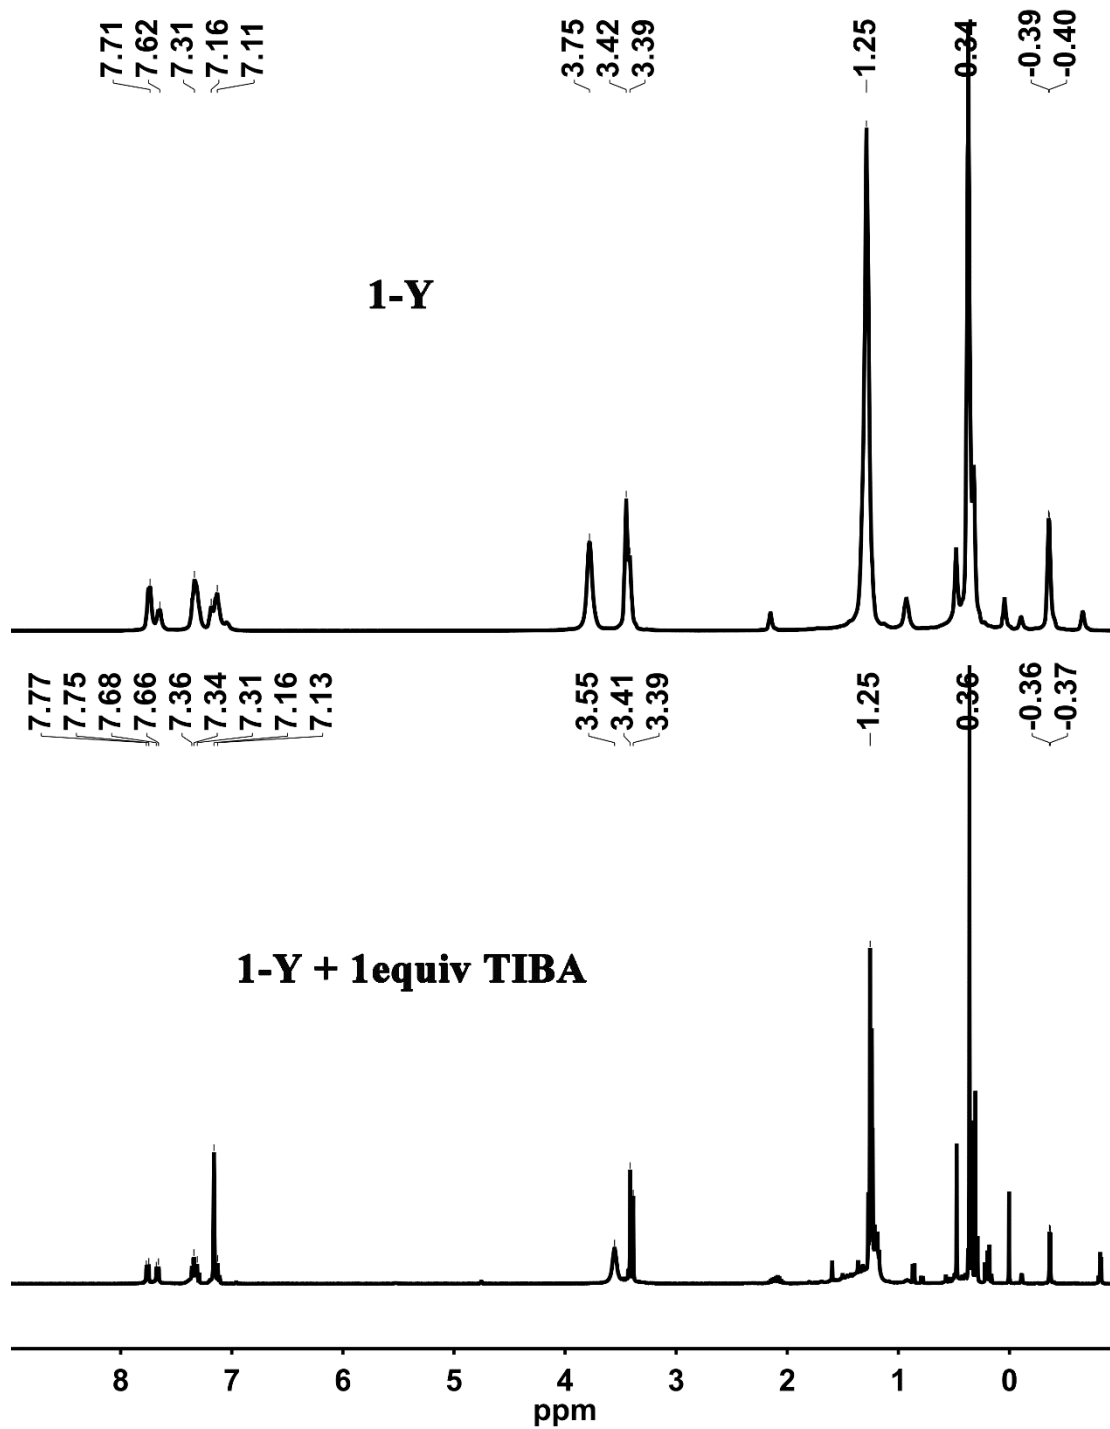

**Figure S17**  $^1\text{H}$  NMR spectrum of **1-Y** and **1-Y + 1 equiv TIBA** (400 MHz,  $\text{C}_6\text{D}_6$ , 25 °C)

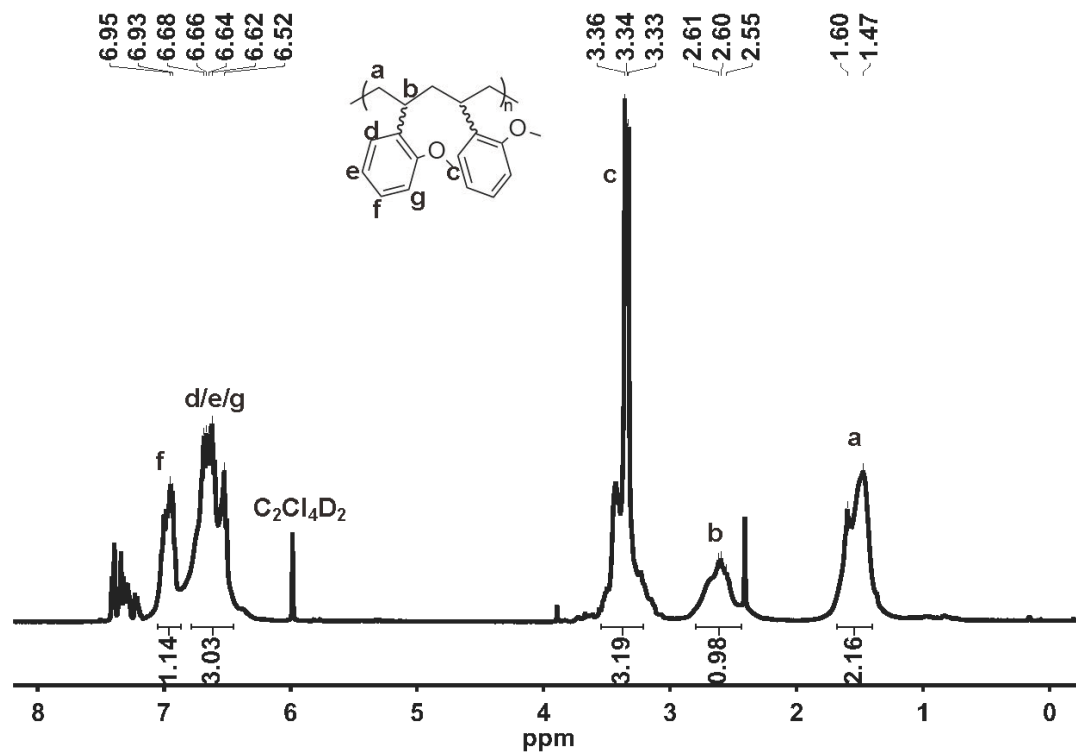

**Figure S18**  $^1\text{H}$  NMR spectrum of atactic P(oMOS) catalyzed by **1-Y**/[Ph<sub>3</sub>C][B(C<sub>6</sub>F<sub>5</sub>)<sub>4</sub>]/TIBA (400 MHz, C<sub>2</sub>Cl<sub>4</sub>D<sub>2</sub>, 120 °C, Entry 3 in Table 2)

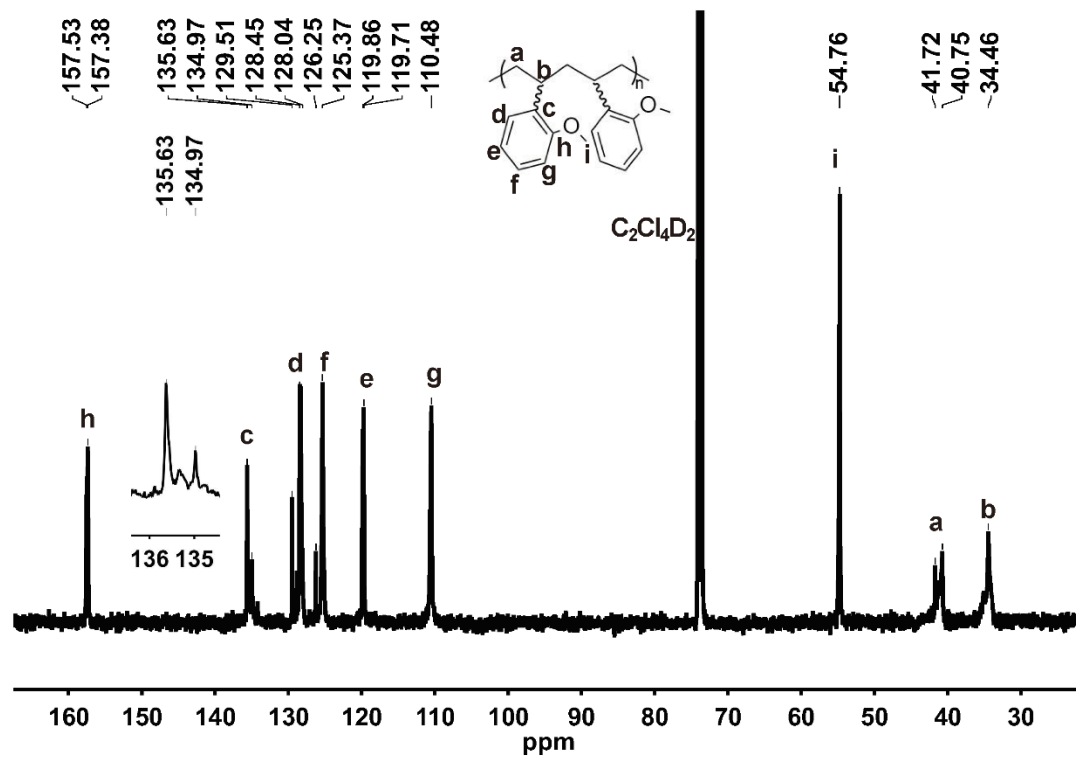

**Figure S19**  $^{13}\text{C}$  NMR spectrum of atactic P(oMOS) catalyzed by **1-Y**/[Ph<sub>3</sub>C][B(C<sub>6</sub>F<sub>5</sub>)<sub>4</sub>]/TIBA (100 MHz, C<sub>2</sub>Cl<sub>4</sub>D<sub>2</sub>, 120 °C, Entry 3 in Table 2)

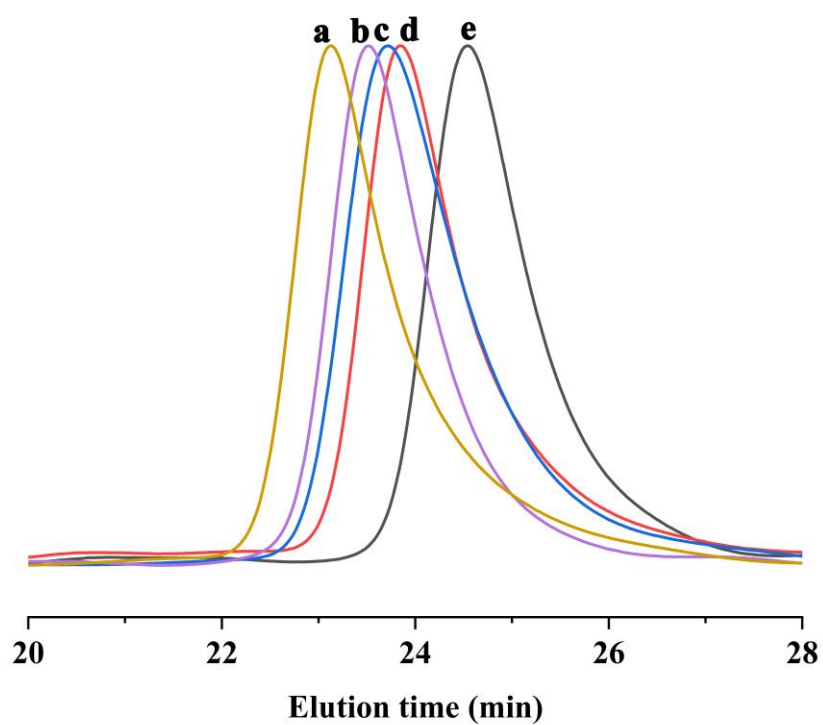

**Figure S20** GPC curves of different polymerization time catalyzed by **1-Y**. time: 3min (a), 2.5min (b), 2min (c), 1.5min (d), and 1min (e)

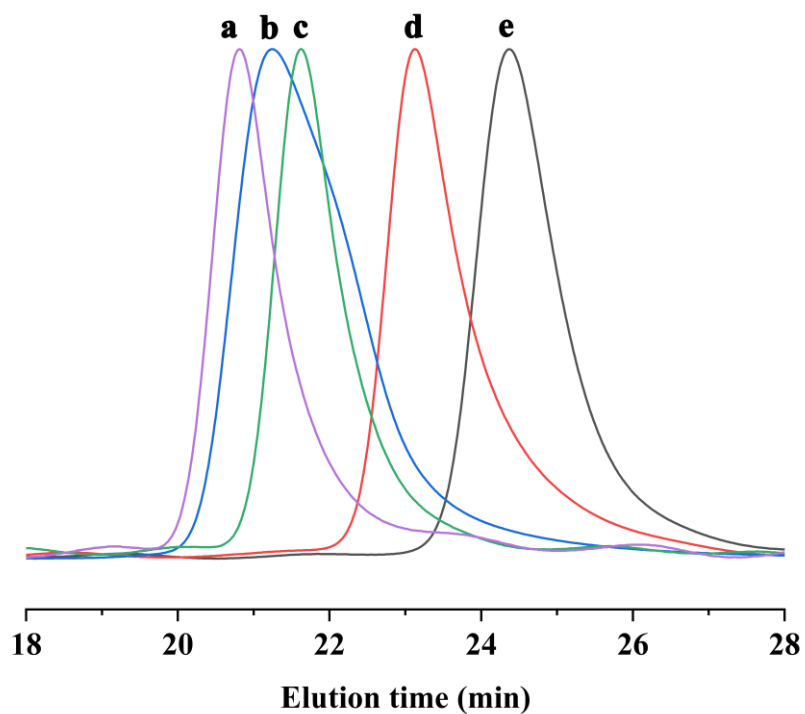

**Figure S21** GPC curves of different monomer feeds catalyzed by **1-Y**. [IP]/[**1-Y**]: 1500 (a), 1000 (b), 750 (c), 500 (d), and 300 (e)

**Table S1** Summary of the crystallographic data for **1-Y**, **1-Lu** and **2-Sc**

|                                                       | <b>1-Y</b>                                                                      | <b>1-Lu</b>                                                                       | <b>2-Sc</b>                                                                     |
|-------------------------------------------------------|---------------------------------------------------------------------------------|-----------------------------------------------------------------------------------|---------------------------------------------------------------------------------|
| Empirical formula                                     | C <sub>29</sub> H <sub>51</sub> N <sub>2</sub> O <sub>3</sub> Si <sub>2</sub> Y | C <sub>29</sub> H <sub>51</sub> LuN <sub>2</sub> O <sub>3</sub> Si <sub>2</sub> Y | C <sub>41</sub> H <sub>55</sub> N <sub>2</sub> O <sub>2</sub> ScSi <sub>2</sub> |
| Formula weight                                        | 620.80                                                                          | 707.87                                                                            | 741.01                                                                          |
| Temperature/K                                         | 150.00                                                                          | 150.00                                                                            | 150.00                                                                          |
| Crystal system                                        | triclinic                                                                       | triclinic                                                                         | orthorhombic                                                                    |
| Space group                                           | <i>P</i> $\bar{1}$ (2)                                                          | <i>P</i> $\bar{1}$ (2)                                                            | <i>P</i> 2 <sub>1</sub> 2 <sub>1</sub> 2 <sub>1</sub> (19)                      |
| <i>a</i> /Å                                           | 10.3675(12)                                                                     | 10.3467(4)                                                                        | 10.8048(16)                                                                     |
| <i>b</i> /Å                                           | 11.7613(12)                                                                     | 11.7319(4)                                                                        | 12.4139(17)                                                                     |
| <i>c</i> /Å                                           | 14.9863(10)                                                                     | 14.9386(5)                                                                        | 30.850(6)                                                                       |
| $\alpha$ /°                                           | 92.529(3)                                                                       | 92.6780(10)                                                                       | 90                                                                              |
| $\beta$ /°                                            | 100.532(3)                                                                      | 100.7490(10)                                                                      | 90                                                                              |
| $\gamma$ /°                                           | 112.138(2)                                                                      | 112.1510(10)                                                                      | 90                                                                              |
| Volume/Å <sup>3</sup>                                 | 1651.3(3)                                                                       | 1636.33(10)                                                                       | 4137.9(11)                                                                      |
| <i>Z</i>                                              | 2                                                                               | 2                                                                                 | 4                                                                               |
| D <sub>c</sub> /Mg m <sup>-3</sup>                    | 1.249                                                                           | 1.437                                                                             | 1.189                                                                           |
| $\mu$ /mm <sup>-1</sup>                               | 1.868                                                                           | 3.119                                                                             | 0.276                                                                           |
| F(000)                                                | 660                                                                             | 726                                                                               | 1584                                                                            |
| Crystal size/mm <sup>3</sup>                          | 0.23×0.19×0.18                                                                  | 0.3×0.1×0.1                                                                       | 0.1×0.08×0.05                                                                   |
| 2 $\theta$ range for data collection/°                | 4.34 to 55.06                                                                   | 4.40 to 55.01                                                                     | 3.99 to 55.04                                                                   |
| Index ranges                                          | -13 ≤ <i>h</i> ≤ 13<br>-15 ≤ <i>k</i> ≤ 15<br>-19 ≤ <i>l</i> ≤ 18               | -13 ≤ <i>h</i> ≤ 13<br>-15 ≤ <i>k</i> ≤ 15<br>-19 ≤ <i>l</i> ≤ 19                 | -14 ≤ <i>h</i> ≤ 14<br>-16 ≤ <i>k</i> ≤ 15<br>-37 ≤ <i>l</i> ≤ 40               |
| Reflections collected                                 | 55689                                                                           | 47958                                                                             | 46196                                                                           |
| Independent reflections                               | 7598<br>R <sub>int</sub> = 0.0988                                               | 7444<br>R(int) = 0.0483                                                           | 9493<br>R(int) = 0.1436                                                         |
| Completeness to $\theta$ /°                           | 25.242(99.9 %)                                                                  | 25.242(98.5 %)                                                                    | 25.242(100.0 %)                                                                 |
| Data/Restraints/Parameters                            | 7598/0/344                                                                      | 7444/0/344                                                                        | 9493/0/457                                                                      |
| Goodness-of-fit on F <sup>2</sup>                     | 1.033                                                                           | 0.963                                                                             | 1.025                                                                           |
| Final R indexes [ <i>I</i> ≥ 2 $\sigma$ ( <i>I</i> )] | R1 = 0.0319<br>wR2 = 0.0725                                                     | R1 = 0.0176<br>wR2 = 0.0521                                                       | R1 = 0.0612<br>wR2 = 0.1308                                                     |
| Final R indexes [all data]                            | R1 = 0.0454<br>wR2 = 0.0768                                                     | R1 = 0.0181<br>wR2 = 0.0524                                                       | R1 = 0.1082<br>wR2 = 0.1532                                                     |
| Largest peak/hole/eÅ <sup>-3</sup>                    | 0.53/-0.41                                                                      | 0.86/-0.82                                                                        | 0.49/-0.29                                                                      |

$$R_1 = \frac{\sum ||F_o| - |F_c||}{\sum |F_o|}; wR_2 = \left[ \frac{\sum w(F_o^2 - F_c^2)^2}{\sum w(F_o^2)^2} \right]^{1/2}$$
